# Supplementary material for: Exploring early steps in biofilm formation: set-up of an experimental system for molecular studies
Source: PubMed Central journal article supplement (PMC4189659; doi:10.1186/s12866-014-0253-z), 2014-09-30
Supplement: 12866_2014_253_MOESM1_ESM.pdf [file 12866_2014_253_MOESM1_ESM.pdf]

1  
2

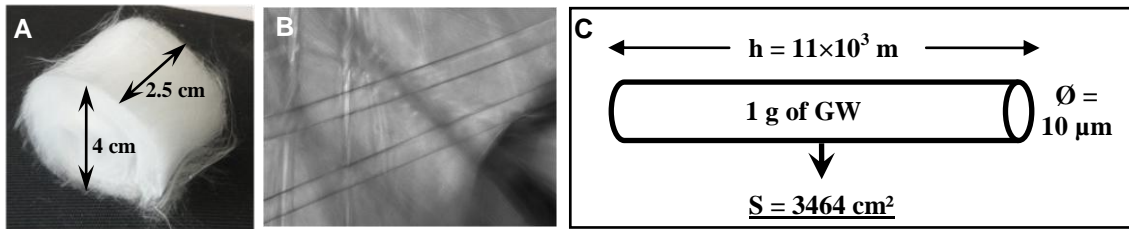

**Additional file 1: Characteristics of 1g piece of glass wool (GW).** (A) Sizes of 1g GW piece ( $\text{Ø}$  and  $h$ ). (B) Determination of the GW fiber diameter by optical microscopy ( $10 \text{ }\mu\text{m}$ ;  $n = 10$ ). (C) The GW density ( $1154.7 \pm 57.6 \text{ kg/m}^3$ ) and the fiber diameter allowed the schematic representation of 1g of GW as a cylinder of  $11 \times 10^3 \text{ m}$  length offering a surface of  $3464 \text{ cm}^2$ .

3  
4
