# Supplementary material for: Exploring early steps in biofilm formation: set-up of an experimental system for molecular studies
Source: PubMed Central journal article supplement (PMC4189659; doi:10.1186/s12866-014-0253-z), 2014-09-30
Supplement: 12866_2014_253_MOESM2_ESM.pdf [file 12866_2014_253_MOESM2_ESM.pdf]

1

2

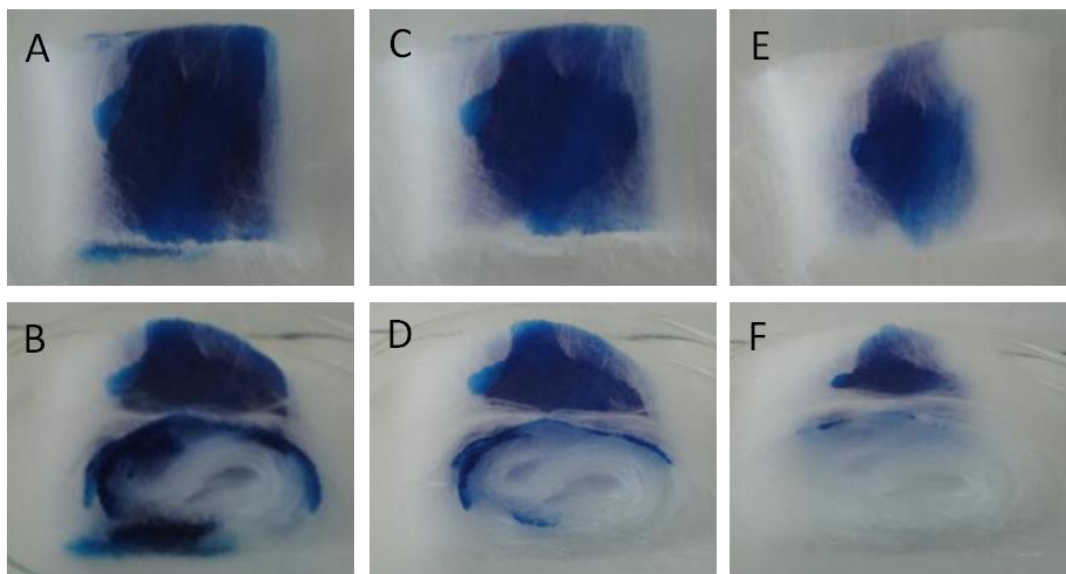

**Additional file 2: Surface covered by the medium adsorbed on a 1g piece of glass wool.** The maximum volume that could be loaded on 1g of GW was determined to be 10 mL. Based on this, we examined by methylene blue staining (see methods section) the % of surface covered as a function of the volume adsorbed on GW. The photos A, C, E present top views and B, D, F vertical section views. A ratio of 10 or 7.5 mL / g GW allowed covering 100% of the surface (not shown); 5 mL / g GW  $61.0 \pm 1.4\%$  (A, B); 2.5 mL / g GW  $30.0 \pm 2.0\%$  (C, D) and 1 mL / g GW  $13.7 \pm 0.8\%$  (E, F). Data were obtained from 6 independent experiments.

3

4
