# Supplementary material for: Exploring early steps in biofilm formation: set-up of an experimental system for molecular studies
Source: PubMed Central journal article supplement (PMC4189659; doi:10.1186/s12866-014-0253-z), 2014-09-30
Supplement: 12866_2014_253_MOESM3_ESM.pdf [file 12866_2014_253_MOESM3_ESM.pdf]

1  
2

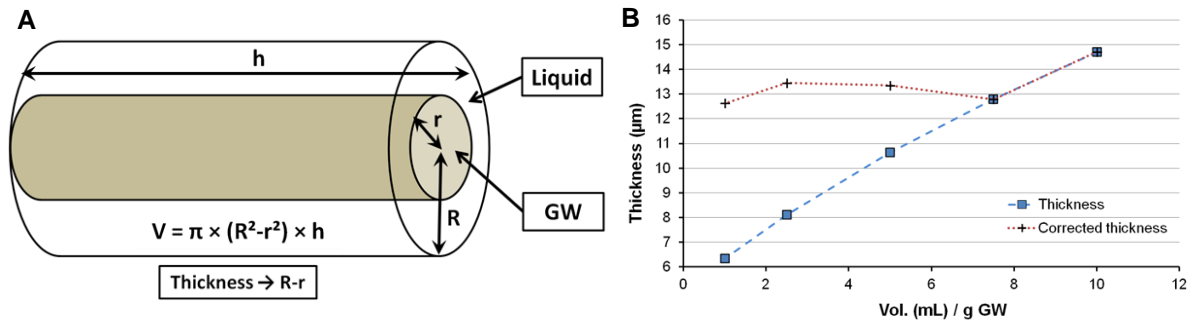

**Additional file 3: Determination of the thickness of medium adsorbed on a 1g piece of glass wool.**

Using a hollow cylinder model (A), we calculated the theoretical thickness of a liquid adsorbed on GW without taking into account the % of covered surface (B; blue line) and taking into account the experimentally determined % of covered surface (B; red line). We determined the existence of a minimal theoretical thickness, relatively constant and calculated to be  $\approx 13 \mu\text{m}$  (B).

3  
4  
5
