# Supplementary material for: Exploring early steps in biofilm formation: set-up of an experimental system for molecular studies
Source: PubMed Central journal article supplement (PMC4189659; doi:10.1186/s12866-014-0253-z), 2014-09-30
Supplement: 12866_2014_253_MOESM4_ESM.pdf [file 12866_2014_253_MOESM4_ESM.pdf]

1  
2

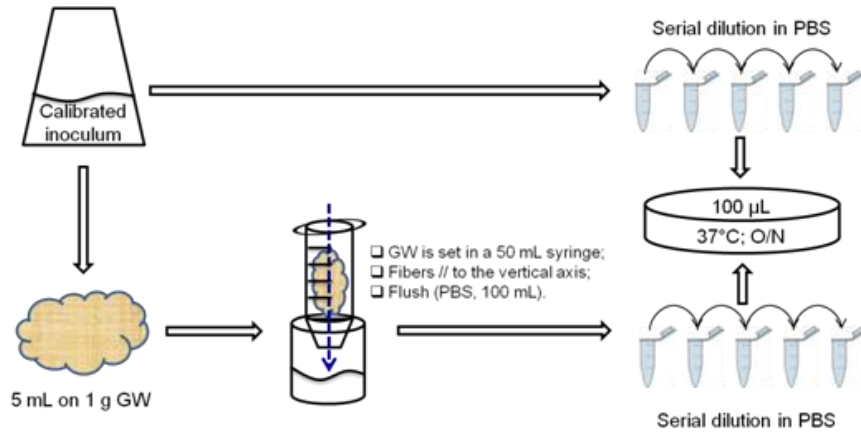

**Additional file 4: Washing process of glass wool allowing separation of strongly attached bacteria from planktonic and weakly attached bacteria.** Washing was performed by 100 mL of PBS going by gravity through the GW set in a syringe. Bacteria were recovered and quantified by plating on agar plates. The calibrated inoculum consisted of LB or SM at  $10^7$ ,  $10^8$  or  $10^9$  CFU/mL was also quantified for comparison. In every case, more than 98% of the inoculated bacteria were harvested in the PBS when GW was treated immediately after inoculation.

3  
4  
5
